# Supplementary material
Source: HighWire-hosted journal article supplement (http://www.qdcxjkg.com/highwire/filestream/132611/field_highwire_adjunct_files/0/ERJ-0114-2016_supplementary_material.pdf)
Supplement: ERJ-0114-2016_supplementary_material.pdf [file ERJ-0114-2016_supplementary_material.pdf]

# Excess medical costs of asthma compared to non-asthma and the role of comorbidity

## Supplementary material

### Table of Contents

|                                                                                                                    |    |
|--------------------------------------------------------------------------------------------------------------------|----|
| S1. Data source.....                                                                                               | 2  |
| S2. List of asthma-related medications used for asthma case definition.....                                        | 3  |
| S3. Flowchart of study cohort selection.....                                                                       | 6  |
| S4. Schematic presentation of study design.....                                                                    | 7  |
| S5. Mapping the American Hospital Formulary Service (AHFS) medication categories to ICD-10 disease categories..... | 8  |
| References.....                                                                                                    | 15 |

## **S1. Data source.**

A provincial health insurance program provides universal health care coverage to all legal residents of British Columbia (BC), Canada, one of the largest provinces, representing 13% of the Canadian population (4.4 million as of 2011) [1]. We retrieved data from the BC provincial health administrative databases for the period of January 1997 to December 2012 (16 years). These databases are linked at individual-level and provide information on health-care encounters of all legal residents of BC. We used registration files (capturing the status of insurance coverage of individuals) [2], vital statistics (capturing births and deaths) [3], the hospital discharge database (capturing inpatient encounters) [4], Medical Services Plan payment information (capturing outpatient encounters with physicians) [5] and PharmaNET (capturing all medication dispensations outside of hospital pharmacies, and regardless of any third-party insurance coverage) [6]. Previous analyses have showed a very low prevalence of missing data, under-reporting and misclassification in these databases [7, 8].

## S2. List of asthma-related medications used for asthma case definition.

| Medication categories                   | Medication type | Active ingredient(s)    | ATC     | DIN                                                                                                                                                                                                                                                                                                                                                                                                                                                                                                                     | Used in case definition? |
|-----------------------------------------|-----------------|-------------------------|---------|-------------------------------------------------------------------------------------------------------------------------------------------------------------------------------------------------------------------------------------------------------------------------------------------------------------------------------------------------------------------------------------------------------------------------------------------------------------------------------------------------------------------------|--------------------------|
| Inhaled corticosteroids (ICS)           | Controller      | Beclomethasone          | R03BA01 | 2242030, 2242029, 374407, 828521, 828548, 872334, 893633, 897353, 1949993, 1950002, 2079976, 2213710, 2213729, 2215039, 2215047, 2215055, 2216531                                                                                                                                                                                                                                                                                                                                                                       | Y                        |
|                                         |                 | Budesonide              | R03BA02 | 2229099, 1978918, 1978926, 852074, 851752, 851760                                                                                                                                                                                                                                                                                                                                                                                                                                                                       | Y                        |
|                                         |                 | Fluticasone             | R03BA05 | 2237247, 2237246, 2237245, 2237244, 2244293, 2244292, 2244291, 2174731, 2174758, 2174766, 2174774, 2213583, 2213591, 2213605, 2213613                                                                                                                                                                                                                                                                                                                                                                                   | Y                        |
|                                         |                 | Ciclesonide             | R03BA08 | 2285614, 2285606, 2303671                                                                                                                                                                                                                                                                                                                                                                                                                                                                                               | Y                        |
| Short-acting beta-agonists (SABA)       | Reliever        | Salbutamol              | R03AC02 | 790419, 812463, 832758, 832766, 851841, 860808, 867179, 897345, 1926934, 1938851, 1938878, 1945203, 1947222, 1986864, 2022125, 2046741, 2048760, 2069571, 2084333, 2148617, 2154412, 2173360, 2208229, 2208237, 2208245, 2212315, 2212323, 2213400, 2213419, 2213427, 2213478, 2213486, 2214997, 2215004, 2215616, 2215624, 2215632, 2216949, 2231430, 2231488, 2231678, 2231783, 2231784, 2232570, 2232987, 2236931, 2236932, 2236933, 2239365, 2239366, 2241497, 2243115, 2243828, 2244914, 2245669, 2259583, 2326450 | Y                        |
|                                         |                 |                         | R03CC02 | 620955, 620963, 874086, 894249, 894257, 1932691, 2035421, 2063689, 2091186, 2146843, 2146851, 2164434, 2164442, 2165368, 2165376, 2212390, 2213435, 2213443, 2213451, 2261324                                                                                                                                                                                                                                                                                                                                           | Y                        |
|                                         |                 | Terbutaline             | R03AC03 | 786616                                                                                                                                                                                                                                                                                                                                                                                                                                                                                                                  | Y                        |
|                                         |                 | Orciprenaline           | R03CB03 | 249920, 3891, 2236783, 2229862, 2152568, 2192675                                                                                                                                                                                                                                                                                                                                                                                                                                                                        | Y                        |
| Long-acting beta-agonists (LABA)        | Controller      | Salmeterol              | R03AC12 | 2211742, 2214261, 2231129, 2136139, 2136147                                                                                                                                                                                                                                                                                                                                                                                                                                                                             | Y                        |
|                                         |                 | Formoterol              | R03AC13 | 2230898, 2237224, 2237225                                                                                                                                                                                                                                                                                                                                                                                                                                                                                               | Y                        |
| ICS and LABA in combination (ICS+LABA)  | Controller      | Budesonide, formoterol  | R03AK07 | 2245385, 2245386                                                                                                                                                                                                                                                                                                                                                                                                                                                                                                        | Y                        |
|                                         |                 | Fluticasone, salmeterol | R03AK06 | 2240835, 2245126, 2245127, 2240836, 2240837                                                                                                                                                                                                                                                                                                                                                                                                                                                                             | Y                        |
| Leukotriene receptor antagonists (LTRA) | Controller      | Montelukast             | R03DC03 | 2247997, 2238217, 2243602, 2238216                                                                                                                                                                                                                                                                                                                                                                                                                                                                                      | Y                        |
|                                         |                 | Zafirlukast             | R03DC01 | 2236606                                                                                                                                                                                                                                                                                                                                                                                                                                                                                                                 | Y                        |
| Anti-                                   | Controller      | Omalizumab              | R03DX05 | 2260565                                                                                                                                                                                                                                                                                                                                                                                                                                                                                                                 | Y                        |

|                                      |            |                                |         |                                                                                                                                                                                                                                                                                                         |   |
|--------------------------------------|------------|--------------------------------|---------|---------------------------------------------------------------------------------------------------------------------------------------------------------------------------------------------------------------------------------------------------------------------------------------------------------|---|
| immunoglobulin E monoclonal antibody |            |                                |         |                                                                                                                                                                                                                                                                                                         |   |
| Inhaled mast cell stabilizers        | Controller | Cromoglicic acid (cromolyn)    | R03BC01 | 2231431, 2231671, 2046113, 534609, 555649, 261238, 638641, 2049082, 2219468                                                                                                                                                                                                                             | Y |
| Theophylline                         | Controller | Choline theophyllinate         | R03DA02 | 346071, 405310, 441724, 441732, 451282, 458708, 458716, 476366, 476390, 476412, 503436, 511692, 536709, 565377, 589942, 589950, 792934                                                                                                                                                                  | Y |
|                                      |            | Theophylline                   | R03DA04 | 156701, 261203, 460982, 460990, 461008, 466409, 488070, 532223, 556742, 575151, 599905, 627410, 631698, 631701, 692689, 692697, 692700, 722065, 1926586, 1926594, 1926608, 1926616, 1926640, 1966219, 1966227, 1966235, 1966243, 1966251, 1966278, 1966286, 2014165, 2014181, 2230085, 2230086, 2230087 | Y |
|                                      |            | Aminophylline                  | R03DA05 | 14923, 178497, 497193, 497193, 497207, 582654, 582662, 868450, 2014270, 2014289                                                                                                                                                                                                                         | Y |
| Inhaled anticholinergics             | Reliever   | Ipratropium bromide            | R01AX03 | 2246084, 2246083, 2163705, 2163713, 2240508, 2240072                                                                                                                                                                                                                                                    | N |
|                                      |            |                                | R03BB01 | 2126222, 2243827, 2231494, 731439, 576158, 2247686, 824216, 2026759, 1950681, 2239131, 2216221, 2210479, 2231785, 2236934, 2236935, 2237134, 2237135, 2239627, 2231135, 2231136, 2231245, 2231244, 2097141, 2097176, 2097168                                                                            | N |
|                                      |            | Ipratropium bromide, fenoterol | R03AK03 | 02148633                                                                                                                                                                                                                                                                                                | N |
|                                      |            | Tiotropium bromide             | R03BB04 | 02246793                                                                                                                                                                                                                                                                                                | N |
| Other beta-agonists                  | Reliever   | Epinephrine                    | R03AA01 | 2017555, 466417, 525103, 1927582                                                                                                                                                                                                                                                                        | N |
|                                      |            | Ephedrine                      | R03CA02 | 2237085, 2229698, 2100231, 2100258, 2243148, 2236722, 2229678, 2219743, 2012111, 2229711, 38121, 2242961, 876534, 893323, 893331, 438847, 2242639, 2126419, 2126400                                                                                                                                     | N |
|                                      |            | Isoprenaline                   | R03AB02 | 2017652                                                                                                                                                                                                                                                                                                 | N |
|                                      |            | Orciprenaline                  | R03AB03 | 1923870, 1928449, 2017660, 254134, 3859                                                                                                                                                                                                                                                                 | N |
| Other corticosteroids                | Controller | Cortisone                      | H02AB10 | 280437, 16241, 16446, 16438                                                                                                                                                                                                                                                                             | N |
|                                      |            | Triamcinolone                  | H02AB08 | 2194090, 15016, 15024, 2194082                                                                                                                                                                                                                                                                          | N |
|                                      |            | Prednisone                     | H02AB07 | 610623, 598194, 550957, 312770, 252417, 210188, 868426, 868434, 868442, 21695, 232378, 607517, 508586, 156876, 271373, 271381                                                                                                                                                                           | N |
|                                      |            | Prednisolone                   | H02AB06 | 21679, 2230619, 2152541, 2245532                                                                                                                                                                                                                                                                        | N |
|                                      |            | Methylprednisolone             | H02AB04 | 1934325, 1934333, 1934341, 30759, 30767, 36129, 30988, 2245406, 2245400, 2245408, 2245407, 2241229, 2231893, 2231894, 2231895,                                                                                                                                                                          | N |

|                            |               |                           |         |                                                                                                                                                                                                                                                                                           |   |
|----------------------------|---------------|---------------------------|---------|-------------------------------------------------------------------------------------------------------------------------------------------------------------------------------------------------------------------------------------------------------------------------------------------|---|
|                            |               |                           |         | 2232750, 2232748, 2063727, 2063697, 2063719, 2063700, 36137, 2230210, 2230211, 30678, 30651, 30643                                                                                                                                                                                        |   |
|                            |               | Betamethasone             | H02AB01 | 2237835, 36366, 2063190, 176834, 28096, 28185                                                                                                                                                                                                                                             | N |
|                            |               | Hydrocortisone            | H02AB09 | 888222, 888230, 888206, 888214, 30910, 30929, 872520, 872539, 878618, 878626, 30635, 30600, 30619, 30627                                                                                                                                                                                  | N |
|                            |               | Dexamathasone             | H02AB02 | 2261081, 2250055, 213624, 16462, 354309, 716715, 874582, 1977547, 664227, 2204274, 2204266, 295094, 285471, 489158, 2239534, 732893, 732885, 2260301, 2237044, 2260298, 2237046, 2237045, 1946897, 1964976, 1964968, 1964070, 2279363, 783900, 751863, 2311267, 2240687, 2240685, 2240684 | N |
| Other xanthines            | Controller    | Theophylline, combination | R03DA54 | 545090, 476374, 334510, 356123, 792942, 721301, 317225, 828718, 640093, 828726, 828742, 307548                                                                                                                                                                                            | N |
| Other anti-allergic agents | Anti-allergic | Levocabastine             | R01AC02 | 2020017                                                                                                                                                                                                                                                                                   | N |
|                            |               | Ketotifen                 | R06AX17 | 2221330, 2176084, 2230730, 2218305, 2231680, 2231679, 600784, 577308                                                                                                                                                                                                                      | N |

### S3. Flowchart of study cohort selection.

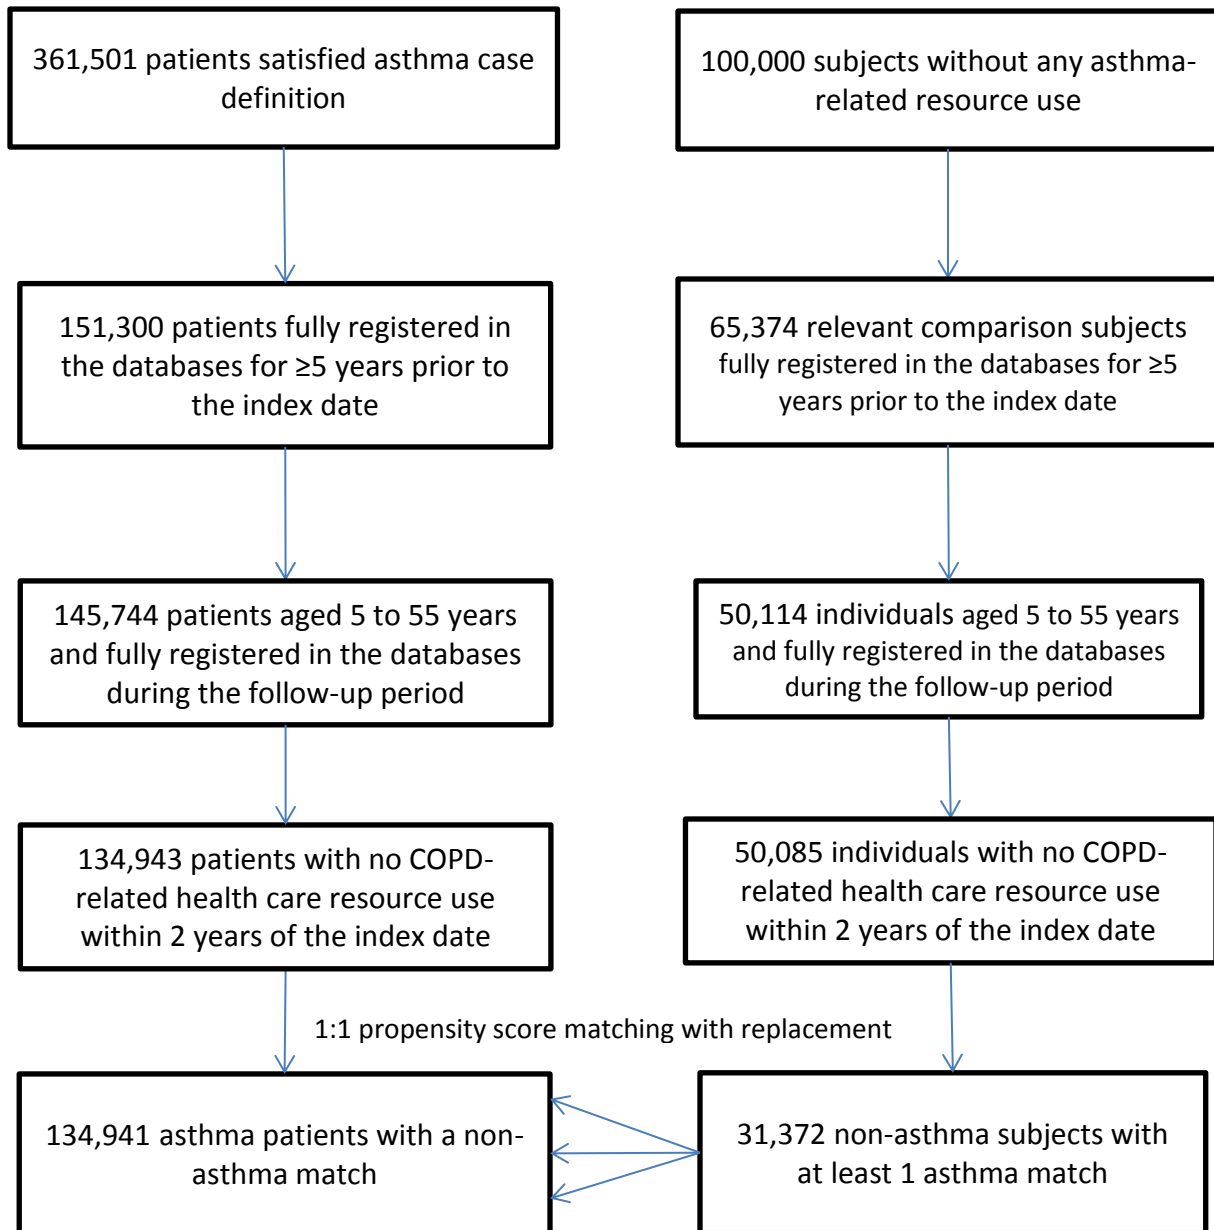

#### S4. Schematic presentation of study design

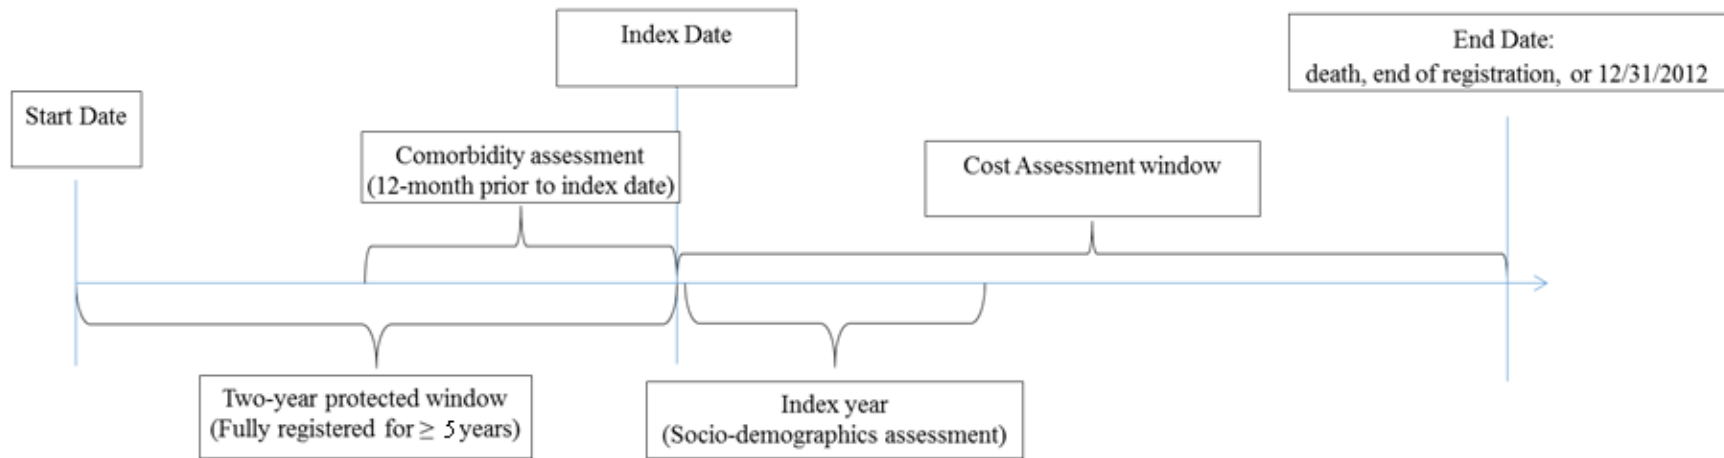

### S5. Mapping the American Hospital Formulary Service (AHFS) medication categories to ICD-10 disease categories.

| Disease category                               | ICD 10 code | AHFS Category Level 1              | AHFS level 1 code | AHFS Category Level 2                 | AHFS level 2 code |
|------------------------------------------------|-------------|------------------------------------|-------------------|---------------------------------------|-------------------|
| Certain infectious and parasitic diseases      | A00-B99     | ANTI-INFECTIVE AGENTS              | 8                 | ANTHELMINTICS                         | 808               |
|                                                |             |                                    |                   | ANTIBACTERIALS                        | 812               |
|                                                |             |                                    |                   | ANTIFUNGAL (SYSTEMIC)                 | 814               |
|                                                |             |                                    |                   | ANTIMYCOBACTERIALS                    | 816               |
|                                                |             |                                    |                   | ANTIPROTOZOALS                        | 830               |
|                                                |             |                                    |                   | ANTIVIRALS (SYSTEMIC)                 | 818               |
|                                                |             |                                    |                   | URINARY ANTI-INFECTIVES               | 836               |
| Neoplasmse                                     | C00-D48     | ANTINEOPLASTIC AGENTS              | 10                | ANTINEOPLASTIC AGENTS                 | 1000              |
| Diseases of the blood and blood-forming origin | D50-D89     | NA                                 | NA                | NA                                    | NA                |
| Endocrine, nutritional and metabolic diseases  | E00-E90     | HORMONES AND SYNTHETIC SUBSTITUTES | 68                | ADRENALS                              | 6804              |
|                                                |             |                                    |                   | ANDROGENS                             | 6808              |
|                                                |             |                                    |                   | ANTIDIABETIC AGENTS                   | 6820              |
|                                                |             |                                    |                   | ANTIHYPOLYCEMIC AGENTS                | 6822              |
|                                                |             |                                    |                   | CONTRACEPTIVES                        | 6812              |
|                                                |             |                                    |                   | ESTROGENS AND ANTIESTROGENS           | 6816              |
|                                                |             |                                    |                   | GONADOTROPINS                         | 6818              |
|                                                |             |                                    |                   | PARATHYROID                           | 6824              |
|                                                |             |                                    |                   | PITUITARY                             | 6828              |
|                                                |             |                                    |                   | PROGESTINS                            | 6832              |
|                                                |             |                                    |                   | SOMATOSTATIN AGONISTS AND ANTAGONISTS | 6829              |
| SOMATOTROPIN AGONISTS AND ANTAGONISTS          | 6830        |                                    |                   |                                       |                   |
| THYROID AND ANTITHYROID AGENTS                 | 6836        |                                    |                   |                                       |                   |
| Mental and behavioural disorders               | F00-F99     | CENTRAL NERVOUS SYSTEM AGENTS      | 28                | ANTICONVULSANTS                       | 2812              |



|                                                                                                                                                   |                    |                                          |    |                                          |      |
|---------------------------------------------------------------------------------------------------------------------------------------------------|--------------------|------------------------------------------|----|------------------------------------------|------|
|                                                                                                                                                   |                    |                                          |    | PSYCHOTHERAPEUTIC AGENTS                 | 2816 |
| Diseases of the nervous system                                                                                                                    | G00-G99            | CENTRAL NERVOUS SYSTEM AGENTS            | 28 | ANALGESICS AND ANTIPIRETTICS             | 2808 |
|                                                                                                                                                   |                    |                                          |    | ANOREXIGENICS;RESPIRATORY,CNS STIMULANTS | 2820 |
|                                                                                                                                                   |                    |                                          |    | ANTIMANIC AGENTS                         | 2828 |
|                                                                                                                                                   |                    |                                          |    | ANTIMIGRAINE AGENTS                      | 2832 |
|                                                                                                                                                   |                    |                                          |    | ANTIPARKINSONIAN AGENTS (CNS)            | 2836 |
|                                                                                                                                                   |                    |                                          |    | ANXIOLYTICS, SEDATIVES AND HYPNOTICS     | 2824 |
|                                                                                                                                                   |                    |                                          |    | CENTRAL NERVOUS SYSTEM AGENTS, MISC.     | 2892 |
|                                                                                                                                                   |                    |                                          |    | GENERAL ANESTHETICS                      | 2804 |
|                                                                                                                                                   |                    |                                          |    | OPIATE ANTAGONISTS                       | 2810 |
| Diseases of the eye and adnexa;<br>Diseases of the ear and mastoid process<br><br>(Combined into one category: diseases of the eye, ear and nose) | H00-H59<br>H60-H95 | EYE, EAR, NOSE AND THROAT (EENT) PREPS.  | 52 | ANTI-INFECTIVES (EENT)                   | 5204 |
|                                                                                                                                                   |                    |                                          |    | ANTI-INFLAMMATORY AGENTS (EENT)          | 5208 |
|                                                                                                                                                   |                    |                                          |    | ANTIALLERGIC AGENTS                      | 5202 |
|                                                                                                                                                   |                    |                                          |    | ANTIGLAUCOMA AGENTS                      | 5240 |
|                                                                                                                                                   |                    |                                          |    | CONTACT LENS SOLUTIONS                   | 5212 |
|                                                                                                                                                   |                    |                                          |    | EENT DRUGS, MISCELLANEOUS                | 5292 |
|                                                                                                                                                   |                    |                                          |    | LOCAL ANESTHETICS (EENT)                 | 5216 |
|                                                                                                                                                   |                    |                                          |    | MOUHWASHES AND GARGLES                   | 5228 |
|                                                                                                                                                   |                    |                                          |    | MYDRIATICS                               | 5224 |
|                                                                                                                                                   |                    |                                          |    | VASOCONSTRICTORS                         | 5232 |
| Diseases of the circulatory system                                                                                                                | I00-I99            | BLOOD FORMATION,COAGULATION + THROMBOSIS | 20 | ANTIANEMIA DRUGS                         | 2004 |
|                                                                                                                                                   |                    |                                          |    | ANTIHEMORRHAGIC AGENTS                   | 2028 |
|                                                                                                                                                   |                    |                                          |    | ANTITHROMBOTIC AGENTS                    | 2012 |
|                                                                                                                                                   |                    |                                          |    | HEMATOPOIETIC AGENTS                     | 2016 |
|                                                                                                                                                   |                    |                                          |    | HEMORRHEOLOGIC AGENTS                    | 2024 |
| Diseases of the circulatory system                                                                                                                | I00-I99            | CARDIOVASCULAR DRUGS                     | 24 | ALPHA-ADRENERGIC BLOCKING AGENTS         | 2420 |
|                                                                                                                                                   |                    |                                          |    | ANTILIPEMIC AGENTS                       | 2406 |
|                                                                                                                                                   |                    |                                          |    | BETA-ADRENERGIC BLOCKING AGENTS          | 2424 |
|                                                                                                                                                   |                    |                                          |    | CALCIUM-CHANNEL BLOCKING AGENTS          | 2428 |

|                                           |         |                                 |    |                                          |      |
|-------------------------------------------|---------|---------------------------------|----|------------------------------------------|------|
|                                           |         |                                 |    | CARDIAC DRUGS                            | 2404 |
|                                           |         |                                 |    | HYPOTENSIVE AGENTS                       | 2408 |
|                                           |         |                                 |    | RENIN-ANGIOTENSIN-ALDOSTERONE SYS. INHIB | 2432 |
|                                           |         |                                 |    | SCLEROSING AGENTS                        | 2416 |
|                                           |         |                                 |    | VASODILATING AGENTS                      | 2412 |
| Diseases of the respiratory system        | J00-J99 | RESPIRATORY TRACT AGENTS        | 48 | ANTI-INFLAMMATORY AGENTS (RESPIRATORY)   | 4810 |
|                                           |         |                                 |    | ANTITUSSIVES                             | 4808 |
|                                           |         |                                 |    | CYSTIC FIBROSIS (CFTR) MODULATORS        | 4814 |
|                                           |         |                                 |    | EXPECTORANTS                             | 4816 |
|                                           |         |                                 |    | MUCOLYTIC AGENTS                         | 4824 |
|                                           |         |                                 |    | PHOSPHODIESTERASE TYPE 4 INHIBITORS      | 4832 |
|                                           |         |                                 |    | PULMONARY SURFACTANTS                    | 4836 |
|                                           |         |                                 |    | RESPIRATORY TRACT AGENTS, MISCELLANEOUS  | 4892 |
| Diseases of the digestive system          | K00-K93 | GASTROINTESTINAL DRUGS          | 56 | ANTACIDS AND ADSORBENTS                  | 5604 |
|                                           |         |                                 |    | ANTI-INFLAMMATORY AGENTS (GI DRUGS)      | 5636 |
|                                           |         |                                 |    | ANTIDIARRHEA AGENTS                      | 5608 |
|                                           |         |                                 |    | ANTIEMETICS                              | 5622 |
|                                           |         |                                 |    | ANTIFLATULENTS                           | 5610 |
|                                           |         |                                 |    | ANTIULCER AGENTS AND ACID SUPPRESSANTS   | 5628 |
|                                           |         |                                 |    | CATHARTICS AND LAXATIVES                 | 5612 |
|                                           |         |                                 |    | CHOLELITHOLYTIC AGENTS                   | 5614 |
|                                           |         |                                 |    | DIGESTANTS                               | 5616 |
|                                           |         |                                 |    | EMETICS                                  | 5620 |
|                                           |         |                                 |    | GI DRUGS, MISCELLANEOUS                  | 5692 |
|                                           |         |                                 |    | LIPOTROPIC AGENTS                        | 5624 |
|                                           |         |                                 |    | PROKINETIC AGENTS                        | 5632 |
| Diseases of the skin and subcutaneous tis | L00-L99 | SKIN AND MUCOUS MEMBRANE AGENTS | 84 | ANTI-INFECTIVES (SKIN + MUCOUS MEMBRANE) | 8404 |

|                                           |         |                     |    |                                          |      |
|-------------------------------------------|---------|---------------------|----|------------------------------------------|------|
|                                           |         |                     |    | ANTI-INFLAMMATORY AGENTS (SKIN + MUCOUS) | 8406 |
|                                           |         |                     |    | ANTIPRURITICS AND LOCAL ANESTHETICS      | 8408 |
|                                           |         |                     |    | ASTRINGENTS                              | 8412 |
|                                           |         |                     |    | CELL STIMULANTS AND PROLIFERANTS         | 8416 |
|                                           |         |                     |    | DEPIGMENTING AND PIGMENTING AGENTS       | 8450 |
|                                           |         |                     |    | DETERGENTS                               | 8420 |
|                                           |         |                     |    | EMOLLIENTS, DEMULCENTS, AND PROTECTANTS  | 8424 |
|                                           |         |                     |    | KERATOLYTIC AGENTS                       | 8428 |
|                                           |         |                     |    | KERATOPLASTIC AGENTS                     | 8432 |
|                                           |         |                     |    | SKIN AND MUCOUS MEMBRANE AGENTS, MISC.   | 8492 |
|                                           |         |                     |    | SUNSCREEN AGENTS                         | 8480 |
| Diseases of the musculoskeletal system an | M00-M99 | NA                  | NA | NA                                       | NA   |
| Diseases of the genitourinary system      | N00-N99 | NA                  | NA | NA                                       | NA   |
| Pregnancy, childbirth and the puerperium  | O00-O99 | NA                  | NA | NA                                       | NA   |
| Certain conditions originating in the per | P00-P96 | NA                  | NA | NA                                       | NA   |
| Congenital malformations, deformations, a | Q00-Q99 | NA                  | NA | NA                                       | NA   |
| Symptoms, signs and abnormal clinical and | R00-R99 | Not included        | NA | NA                                       | NA   |
| Injury, poisoning and certain other conse | S00-T98 | Not included        | NA | NA                                       | NA   |
| Provisional codes for research and tempor | U00-U99 | Not included        | NA | NA                                       | NA   |
| External causes of morbidity and mortalit | V01-Y98 | Not included        | NA | NA                                       | NA   |
| Factors influencing health status and con | Z01-Z99 | Not included        | NA | NA                                       | NA   |
| NA                                        | MIS     | ANTIHISTAMINE DRUGS | 4  | FIRST GENERATION ANTIHISTAMINES          | 404  |
|                                           |         |                     |    | OTHER ANTIHISTAMINES                     | 492  |
|                                           |         |                     |    | SECOND GENERATION ANTIHISTAMINES         | 408  |

|                          |      |                   |    |                                          |      |
|--------------------------|------|-------------------|----|------------------------------------------|------|
|                          |      | AUTONOMIC DRUGS   | 12 | ANTICHOLINERGIC AGENTS                   | 1208 |
|                          |      |                   |    | AUTONOMIC DRUGS, MISCELLANEOUS           | 1292 |
|                          |      |                   |    | PARASYMPATHOMIMETIC (CHOLINERGIC AGENTS) | 1204 |
|                          |      |                   |    | SKELETAL MUSCLE RELAXANTS                | 1220 |
|                          |      |                   |    | SYMPATHOLYTIC ADRENERGIC BLOCKING AGENTS | 1216 |
|                          |      |                   |    | SYMPATHOMIMETIC (ADRENERGIC) AGENTS      | 1212 |
|                          |      | BLOOD DERIVATIVES | 16 | BLOOD DERIVATIVES                        | 1600 |
|                          |      | DENTAL AGENTS     | 34 | DENTAL AGENTS                            | 3400 |
|                          |      | DEVICES           | 94 | DEVICES                                  | 9400 |
|                          |      | DIAGNOSTIC AGENTS | 36 | ADRENOCORTICAL INSUFFICIENCY             | 3604 |
|                          |      |                   |    | DIAGNOSTIC AGENTS                        | 3600 |
|                          |      |                   |    | DIPHThERIA                               | 3628 |
|                          |      |                   |    | DRUG HYPERSENSITIVITY                    | 3630 |
|                          |      |                   |    | FUNGI                                    | 3632 |
|                          |      |                   |    | GALLBLADDER FUNCTION                     | 3634 |
|                          |      |                   |    | GASTRIC FUNCTION                         | 3636 |
|                          |      |                   |    | INTESTINAL ABSORPTION                    | 3638 |
|                          |      |                   |    | KIDNEY FUNCTION                          | 3640 |
|                          |      |                   |    | LIVER FUNCTION                           | 3644 |
|                          |      |                   |    | MUMPS                                    | 3652 |
| MYASTHENIA GRAVIS        | 3656 |                   |    |                                          |      |
| OCULAR DISORDERS         | 3658 |                   |    |                                          |      |
| PANCREATIC FUNCTION      | 3661 |                   |    |                                          |      |
| PITUITARY FUNCTION       | 3666 |                   |    |                                          |      |
| ROENTGENOGRAPHY          | 3668 |                   |    |                                          |      |
| THYROID FUNCTION         | 3660 |                   |    |                                          |      |
| TUBERCULOSIS             | 3684 |                   |    |                                          |      |
| URINE AND FECES CONTENTS | 3688 |                   |    |                                          |      |

|  |  |                                              |    |                                              |      |
|--|--|----------------------------------------------|----|----------------------------------------------|------|
|  |  | DISINFECTANTS (FOR NON-<br>DERMATOLOGIC USE) | 38 | DISINFECTANTS (FOR NON-<br>DERMATOLOGIC USE) | 3800 |
|  |  | ELECTROLYTIC, CALORIC, AND WATER<br>BALANCE  | 40 | ACIDIFYING AGENTS                            | 4004 |
|  |  |                                              |    | ALKALINIZING AGENTS                          | 4008 |
|  |  |                                              |    | AMMONIA DETOXICANTS                          | 4010 |
|  |  |                                              |    | CALORIC AGENTS                               | 4020 |
|  |  |                                              |    | DIURETICS                                    | 4028 |
|  |  |                                              |    | ION-REMOVING AGENTS                          | 4018 |
|  |  |                                              |    | IRRIGATING SOLUTIONS                         | 4036 |
|  |  |                                              |    | REPLACEMENT PREPARATIONS                     | 4012 |
|  |  |                                              |    | SALT AND SUGAR SUBSTITUTES                   | 4024 |
|  |  |                                              |    | URICOSURIC AGENTS                            | 4040 |
|  |  | ENZYMES                                      | 44 | ENZYMES                                      | 4400 |
|  |  | GOLD COMPOUNDS                               | 60 | GOLD COMPOUNDS                               | 6000 |
|  |  | HEAVY METAL ANTAGONISTS                      | 64 | HEAVY METAL ANTAGONISTS                      | 6400 |
|  |  | LOCAL ANESTHETICS (PARENTERAL)               | 72 | LOCAL ANESTHETICS (PARENTERAL)               | 7200 |
|  |  | MISCELLANEOUS THERAPEUTIC AGENTS             | 92 | 5-ALPHA-REDUCTASE INHIBITORS                 | 9208 |
|  |  |                                              |    | ALCOHOL DETERRENTS                           | 9204 |
|  |  |                                              |    | ANTIDOTES                                    | 9212 |
|  |  |                                              |    | ANTIGOUT AGENTS                              | 9216 |
|  |  |                                              |    | BONE RESORPTION INHIBITORS                   | 9224 |
|  |  |                                              |    | CARIOSTATIC AGENTS                           | 9228 |
|  |  |                                              |    | COMPLEMENT INHIBITORS                        | 9232 |
|  |  |                                              |    | DISEASE-MODIFYING ANTIRHEUMATIC<br>AGENTS    | 9236 |
|  |  |                                              |    | GONADOTROPIN-RELEASING HORMONE<br>ANTAGNTS   | 9240 |
|  |  |                                              |    | IMMUNOMODULATORY AGENTS                      | 9220 |
|  |  |                                              |    | IMMUNOSUPPRESSIVE AGENTS                     | 9244 |
|  |  |                                              |    | OTHER MISCELLANEOUS THERAPEUTIC<br>AGENTS    | 9292 |

|  |  |                                      |                   |                                       |      |
|--|--|--------------------------------------|-------------------|---------------------------------------|------|
|  |  |                                      | PROTECTIVE AGENTS | 9256                                  |      |
|  |  | OXYTOCICS                            | 76                | OXYTOCICS                             | 7600 |
|  |  | PHARMACEUTICAL AIDS                  | 96                | PHARMACEUTICAL AIDS                   | 9600 |
|  |  | SMOOTH MUSCLE RELAXANTS              | 86                | GENITOURINARY SMOOTH MUSCLE RELAXANTS | 8612 |
|  |  |                                      |                   | RESPIRATORY SMOOTH MUSCLE RELAXANTS   | 8616 |
|  |  | VITAMINS                             | 88                | MULTIVITAMIN PREPARATIONS             | 8828 |
|  |  |                                      |                   | VITAMIN A                             | 8804 |
|  |  |                                      |                   | VITAMIN B COMPLEX                     | 8808 |
|  |  |                                      |                   | VITAMIN C                             | 8812 |
|  |  |                                      |                   | VITAMIN D                             | 8816 |
|  |  |                                      |                   | VITAMIN E                             | 8820 |
|  |  | VITAMIN K ACTIVITY                   | 8824              |                                       |      |
|  |  | CONTRACEPTIVES (E.G. FOAMS, DEVICES) | 32                | CONTRACEPTIVES (E.G. FOAMS, DEVICES)  | 3200 |
|  |  | SERUMS, TOXOIDS, AND VACCINES        | 80                | SERUMS                                | 8004 |
|  |  |                                      |                   | TOXOIDS                               | 8008 |
|  |  |                                      |                   | VACCINES                              | 8012 |

## References

1. Government of Canada SC. Population by sex and age group, by province and territory (Number, both sexes) [Internet]. 2014 [cited 2015 Feb 6]. Available from: <http://www.statcan.gc.ca/tables-tableaux/sum-som/l01/cst01/demo31a-eng.htm>. Date last accessed: Aug 8, 2016.
2. British Columbia Ministry of Health [creator]. Consolidation File (MSP Registration & Premium Billing). Population Data BC[publisher]. Data Extract. MOH. 2014. [www.popdata.bc.ca/data](http://www.popdata.bc.ca/data). Date last accessed: Aug 8, 2016.
3. BC Vital Statistics Agency [creator]. Vital Statistics Deaths. Population Data BC [publisher]. Data Extract. BC Vital Statistics Agency. 2014. [www.popdata.bc.ca/data](http://www.popdata.bc.ca/data). Date last accessed: Aug 8, 2016.
4. British Columbia Ministry of Health [creator]. Discharge Abstract Database (Hospital Separations). Population Data BC [publisher]. Data Extract. MOH. 2014. [www.popdata.bc.ca/data](http://www.popdata.bc.ca/data). Date last accessed: Aug 8, 2016.
5. British Columbia Ministry of Health [creator]. Medical Services Plan (MSP) Payment Information File. Population Data BC [publisher]. Data Extract. MOH. 2014. [www.popdata.bc.ca/data](http://www.popdata.bc.ca/data). Date last accessed: Aug 8, 2016.
6. British Columbia Ministry of Health [creator]. PharmaNet. BC Ministry of Health [publisher]. Data Extract. Data Stewardship Committee. 2013. [www.popdata.bc.ca/data](http://www.popdata.bc.ca/data). Date last accessed: Aug 8, 2016.
7. CIHI. CIHI Data Quality Study of the DAD 2009-2010 Discharge Abstract Database. 2012. [secure.cihi.ca/estore/productFamily.htm?pf=PFC1762&lang=en&media=0](http://secure.cihi.ca/estore/productFamily.htm?pf=PFC1762&lang=en&media=0). Date last accessed: Aug 8, 2016.
8. Williams JI, Young W. Inventory of studies on the accuracy of Canadian health administrative databases. Technical report. Institute for Clinical Evaluative Sciences, Ottawa, Canada; 1996.
